# Supplementary material for: The Potamochemical symphony: new progresses in the high frequency acquisition of stream chemical data
Source: Copernicus journal article supplement (doi:10.5194/hess-2017-12), 2017-01-13

## **Associated content**

### Tangential filtration characteristics

316L SAE steel grades. The primary circuit flows through a porous pipe. A flow of 1 liter per hour of water oozes to the outside of this pipe and feeds a secondary circuit: Filtered water circuit. Each 5 minutes, ultrasound motor checks the filter and a back flushing of compressed air system keep pores of the pipe free. The porous pipe is composed of stainless steel. It is changed each 6 month.

The acetate of cellulose filter at 0.2  $\mu\text{m}$  is changed each two weeks to prevent clogging and cross contamination.

The material in contact with the sample solution is PEEK (poly- ether-ether-ketones).

### Ion Chromatographs characteristics

Both ICS2100 chromatographs work under an isocratic eluent regime. The running time is 39 minutes and the injection time is 2 minutes. For more details and information, please see the company website: <http://www.dionex.com>. The volume injected is with a 25- $\mu\text{L}$  sample circuit. A deionised water tank purified by a Millipore system purveys pure water for elution preparation. The software developed by Dionex, Chromeleon 7<sup>®</sup> controls the whole system.

#### 1) Cation measurement

The cation chromatograph is thermostated at  $40.0 \pm 0.1$  °C for the column and the detection cell. The system is provided with a guard column (2x50mm). To reduces the baseline drift by removing contaminants instrument is equipped IonPac<sup>®</sup> Cation Trap Columns (CR-CTC). The precolumn is a CG16 and the column is a CS16 in 2mm. The system is equipped with a suppressor system CSRS 500 (2 mm) set to 32 mA. The

eluant is generated from a concentrate cartridge of EGCIH, MSA. The eluent concentration is 30.00 mM. The flow rate is 0.36 ml/min. Consequently, the eluent cartridge autonomy is 3 months.

## 2) Anion measurement

The anion chromatograph is thermostated at  $30.0 \pm 0.1$  °C for the column and at  $35.0 \pm 0.1$  °C for the detection cell. The system is provided with a guard column (2x50mm). To reduce the baseline drift by removing contaminants the instrument is equipped with IonPac<sup>®</sup> Anion Trap Columns (CR-ATC). The precolumn is an AG18 and the column is an AS18 in 2mm. The system is equipped with a suppressor system ASRS 300 (2 mm) set to 15 mA. The eluant is generated from a concentrate cartridge of EGCIH, KOH. The eluent concentration is 23.00 mM. The flow rate is 0.25 ml/min. Consequently, the eluent cartridge autonomy is 9 months.

## 3) Blank Control

Pure distilled water is regularly (every two weeks) introduced to check the residual noise. The check is always satisfactory for all elements except for two cationic species.

## Reproducibility test conditions

For each sample, water collected was filtered directly after sampling using 0.2 µm cellulose acetate filters using a Teflon<sup>®</sup> filtration unit. Samples were consigned in two acid-washed polypropylene bottles. One bottle was acidified to pH 2 with ultra purified HNO<sub>3</sub> for cation analysis and Sr isotopes ratio measurements. The second one was kept non-acidified for anion analysis. Solute concentration of major elements, i.e. Na, K, Mg, Ca, Cl, NO<sub>3</sub> and SO<sub>4</sub> were measured by ionic chromatography (IC) Dionex<sup>®</sup> 120 at IPGP, Paris. Each sample has been run in triplicate with a relative external reproducibility better than 1% (2σ).

Figure SI 1

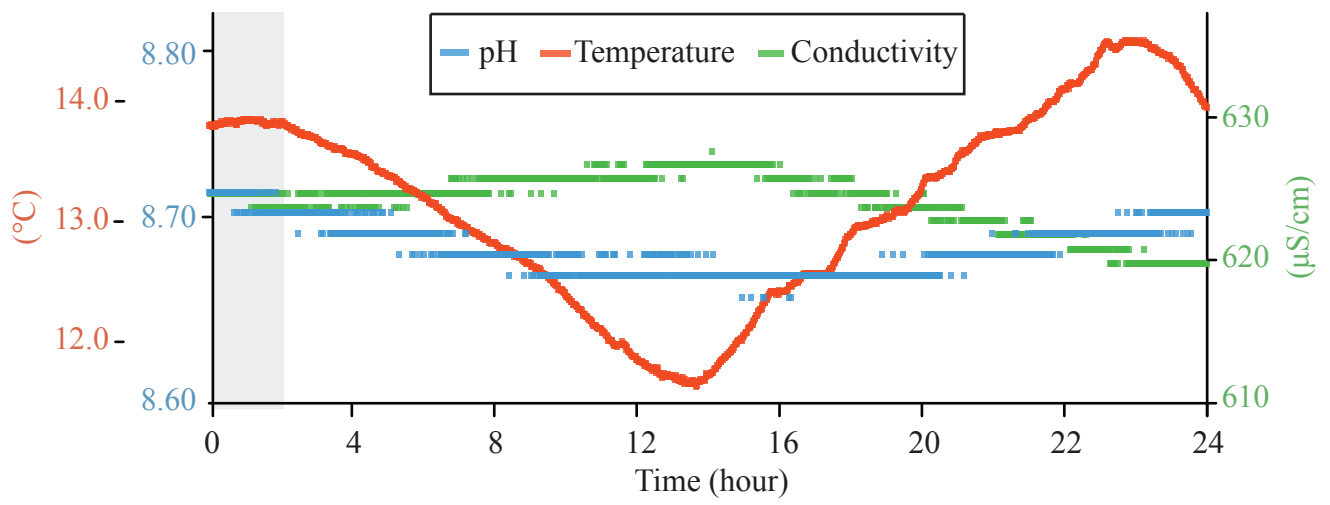

Supplement: Supplementary file 1 [file hess-2017-12-supplement.pdf]
